# Supplementary material for: Facet-Engineered Flexoelectricity of Centrosymmetric Semiconductors
Source: Research Square preprint supplement (doi:10.21203/rs.3.rs-6565288/v1), 2025-06-11
Supplement: Supplementary file 1 [file 178c4efd134f7ac1ba95a175.docx]

Supplementary materials

**Facet-Engineered Flexoelectricity of Centrosymmetric Semiconductors**

Yifan Wang1,*, Haoxuan Wang1,*, Xin Zhang1, Hongxing Shang1, Wenyuan Liu1, Feng Deng1, Jianwei Song1, Xu Liang1,[[1]](#footnote-1), Shuling Hu1, Shengping Shen1,‡, Wanlin Guo2

1State Key Laboratory for Strength and Vibration of Mechanical Structures, Chemomechanical Coupling and Intelligent Media Laboratory, School of Aerospace Engineering, Xi’an Jiaotong University, Xi’an 710049, China

2State Key Laboratory of Mechanics and Control of Mechanical Structures, Key Laboratory for Intelligent Nano Materials and Devices of the Ministry of Education, Nanjing University of Aeronautics and Astronautics, 210016 Nanjing, China

**1 The sample details of flexoelectric coefficient measurements**


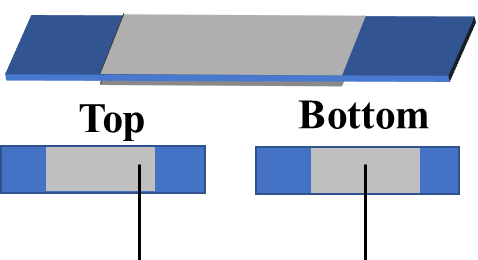


**FIG. S1**. A typical sample used for flexoelectric characterization. The electrodes (gray) with half-length a are deposited on the sample, and then copper wires (black) are attached to the electrode.

**2 The experimental setup for flexoelectric coefficient measurement.**


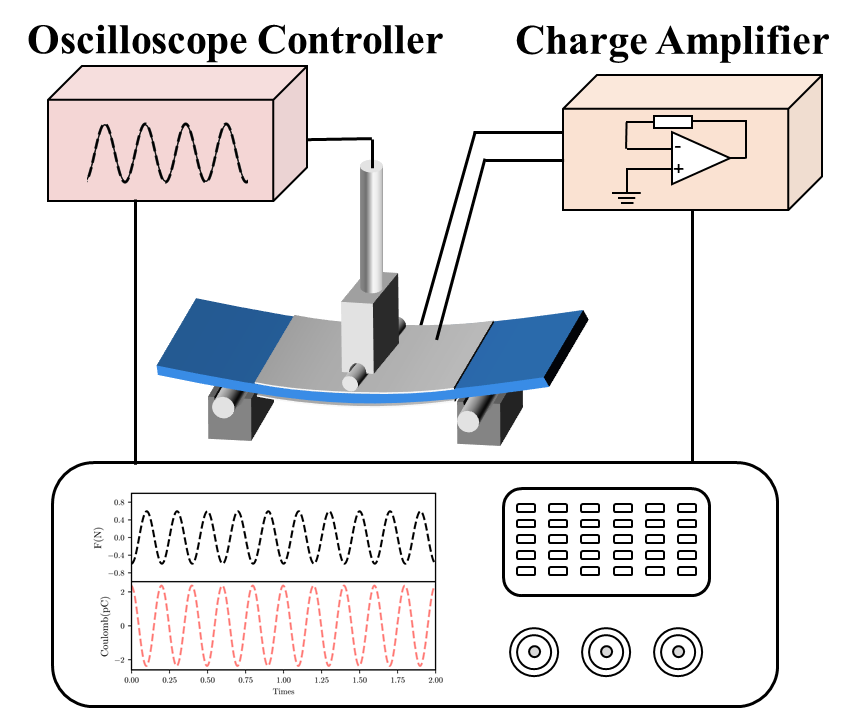


**FIG. S2**. Experimental setup for flexoelectric coefficient measurement.

**3 The conductivity and I-V curves of TiO2 with five different facets**


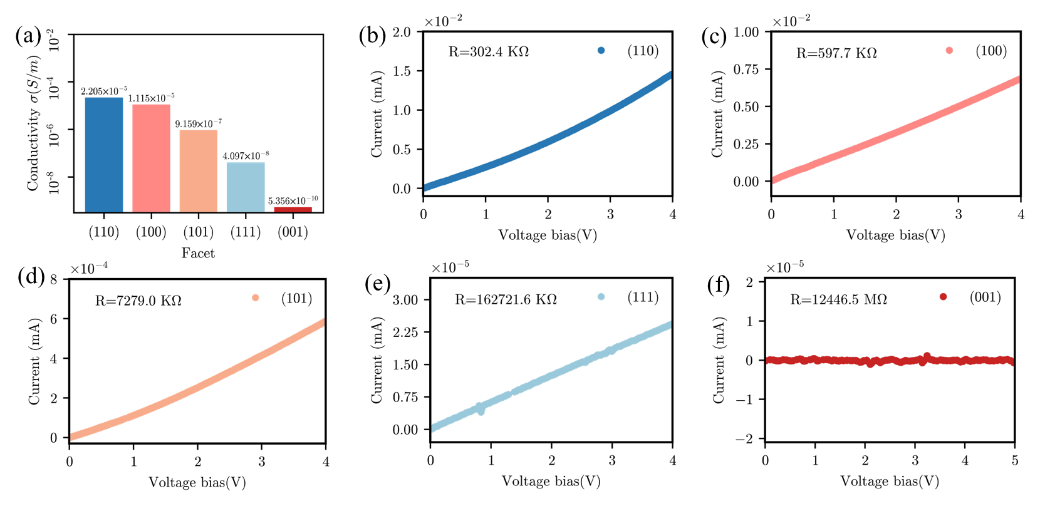


**FIG. S3**. Conductivity and I-V curves of different facets. (a) conductivity of different facets, I-V curves of (b) (110), (c) (100), (d) (101), (e) (111), and (f) (001) crystal facets.

**4 The details of the** **quantitative relationship between the effective flexoelectric coefficient and conductivity**

4.1 The detailed derivation process of the quantitative equation relating the effective flexoelectric coefficient to electrical conductivity

The expression for the effective flexoelectric coefficient of semiconductors is as follows1,2:

where is electron concentration, is the electron charge, is the vacuum dielectric constant, is the relative dielectric constant,  is the height of the Schottky barrier, is the thickness of the sample and is the surface deformation potential.

For Schottky barrier, the effective barrier capacitance follows:

where  is the area of Schottky barrier.

Thus, we can get the effective flexoelectric coefficient expression as follows:

It’s obvious that the effective flexoelectric coefficient is proportional to the effective barrier capacitance, which is consistent with the previous study [2]. However, a key unresolved issue is determining how much bulk conductivity must increase for a material to transition from capacitive to resistive behavior within the equivalent circuit, resulting in a significant enhancement of the overall capacitance.

Here, we try to investigate the relationship between the effective barrier capacitance and bulk conductivity from perspective of impedance analysis. Note that the equivalent circuit corresponding to Eq. S3 is a RC series circuit as shown in Fig. S4 (a), in which only accounts for the bulk material's resistive properties, neglecting its capacitive role. In this study, we represent the bulk as a parallel RC circuit as shown in Fig. S4 (b). Thus, the impedance can be expressed as:

where and ​ are the thin layer capacitance of the interfacial barrier layers, and denote the capacitance and resistance of the bulk, respectively.

We assume that the capacitors and ​ are identical, i.e.​, , the expression can be simplified as:

To maintain consistency with the aforementioned theory corresponding to Eq. S6, the overall impedance can be expressed by modeling the entire circuit as an equivalent series combination of two capacitors and a resistor as shown in Fig. S4 (a).

Therefore, the equivalent capacitive reactance () of the equivalent capacitance can be expressed as:

Thus, the equivalent capacitance follows:

The relationship between conductivity and resistance satisfies:

By substituting Eq. S8 and Eq. S9 into Eq. S3, the effective flexoelectric coefficient of semiconductors is as follows:


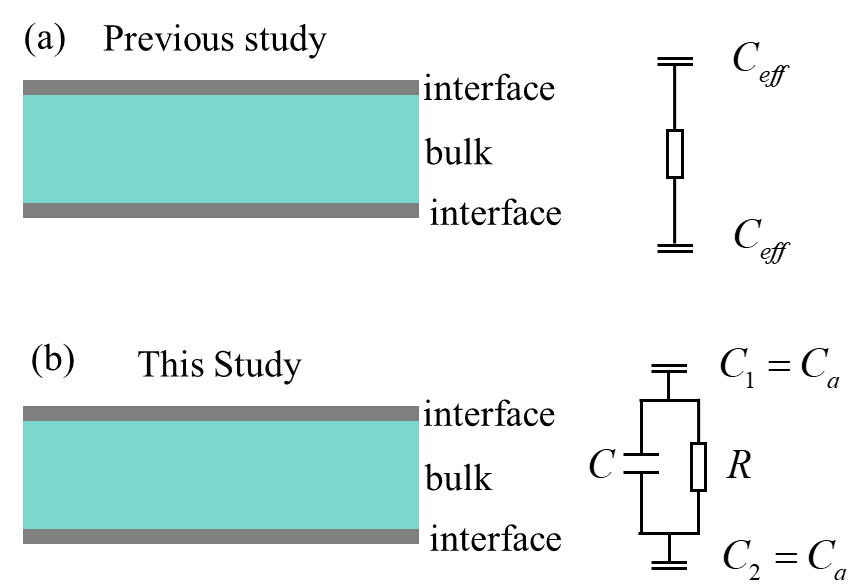


**FIG. S4**. The equivalent circuit of previous study (a) and this study (b).

4.2 The parameter determination of theoretical prediction

As mentioned above, the effective flexoelectric coefficient of semiconductors is the function of , , and . In any dielectric impedance measurement, he capacitance and resistance data represent the equivalent values derived from modeling the dielectric as either a parallel RC circuit or a series RC circuit. Our equivalent series circuit consists of two capacitors and a resistor, the overall impedance can be divided into equivalent resistance and equivalent capacitance . As derived from Eq. S8 and Eq. S9, we know the effective resistance is the function of , and , where . If measurements are conducted under DC conditions where , the intrinsic resistance can be accurately determined. But, and cannot be directly measured experimentally due to the pronounced electrode polarization effect. As charges accumulate at the electrode-sample interface, this effect artificially inflates the effective capacitance, thereby obscuring the material's intrinsic capacitance. Thus, they are determined by fitting the theoretical formula to data points for both Rutile TiO2, Nb-doped SrTiO3, and SrTiO3 to show the observed trend that a sharp increase in as surpasses a critical threshold as shown in Fig. 3(b) and Fig .S5. The parameters are listed in Table S1.


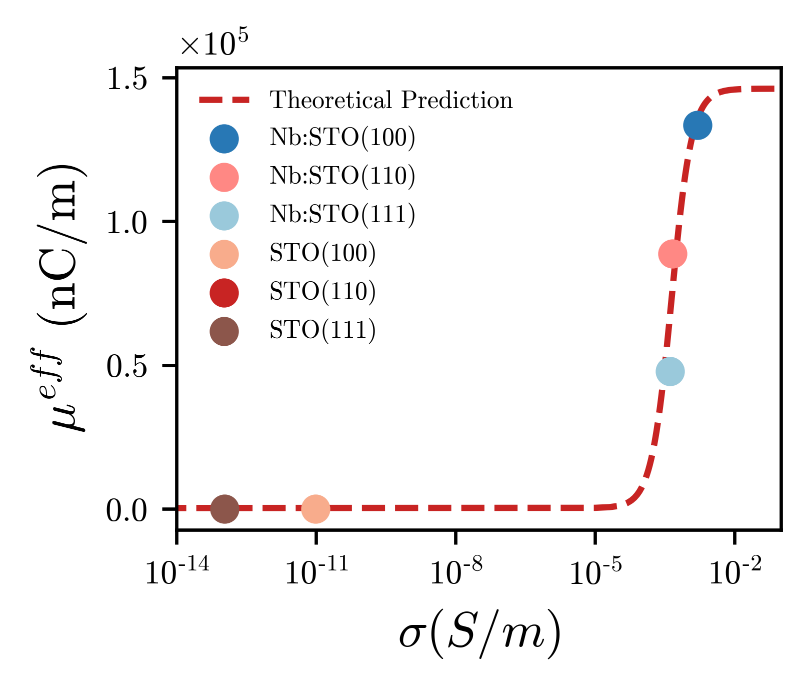


**FIG .S5** The relationship between the effective flexoelectric coefficient and the electrical conductivity for different facets and the equivalent circuit model for 0.5 wt% Nb-doped SrTiO3 and pure SrTiO3

**TABLE S1**. The parameter determination of theoretical prediction for TiO2, Nb:STO and STO

|  | *C*(*F*) | *Ca*(*F*) | *A*(*m2*) | *t*(*m*) | *φ* |
| --- | --- | --- | --- | --- | --- |
| TiO2 |  |  |  |  | 0.1 |
| Nb:STO(STO) |  |  |  |  | 0.2 |

**5 The detailed derivation process of the relationship between the conductivity and carrier effective mass**

To further analyze the microscopic mechanism of the anisotropy of electrical conductivity, we will conduct an in-depth investigation from the perspectives of carrier mobility. The relationship between conductivity of semiconductor and carrier mobility is as follows:

where is the conductivity, and are electron concentration and hole concentration, is the electron charge, and is the mobility of electron and hole, respectively.

TiO2 single crystal is n-type semiconductor, in which the electron is the major carrier, the conductivity is mainly dominated by the electron as follows:

According to the deformation potential theory3, the carrier mobility satisfies the following:

where is the electron mobility, is electron concentration, is the electron charge, is the scattering time, is the Planck constant, is temperature,  is the effective electron mass, is the Boltzmann constant, is the elastic constant, is the deformation potential constant and is the lattice orientation.

Thus, combining Equation (S.12) and (S.13), we can obtain the relationship between the conductivity and carrier effective mass as follows:

**6 The DFT calculation of the effective mass of carriers**

We calculate the effective mass anisotropy adopting the first method in VASPKIT4. The POSCAR file of the rutile TiO2 primitive cell is from the material project website with six atoms and lattice parameters (a = 4.653 Å and c = 2.969 Å) .


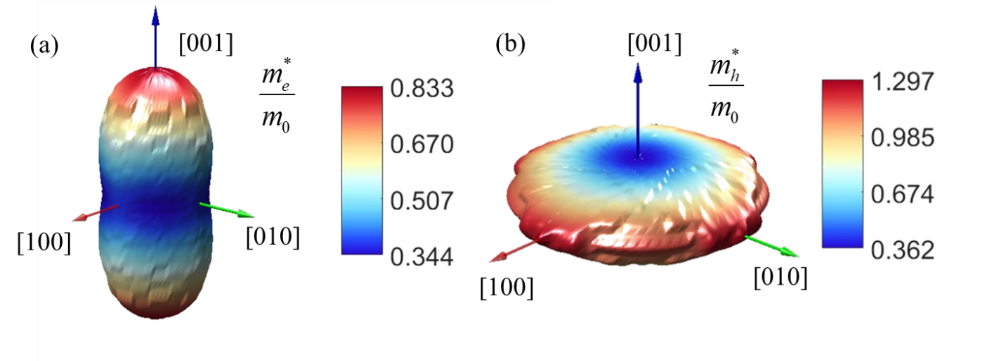


**FIG. S6**. The three-dimensional coordinate plots of the anisotropic effective masses of electron and hole are presented. **a** Electron. **b** Hole.

**7 The I-V curves of 0.5 wt% Nb-doped SrTiO3 and STO with (100), (110) and (111) facets**


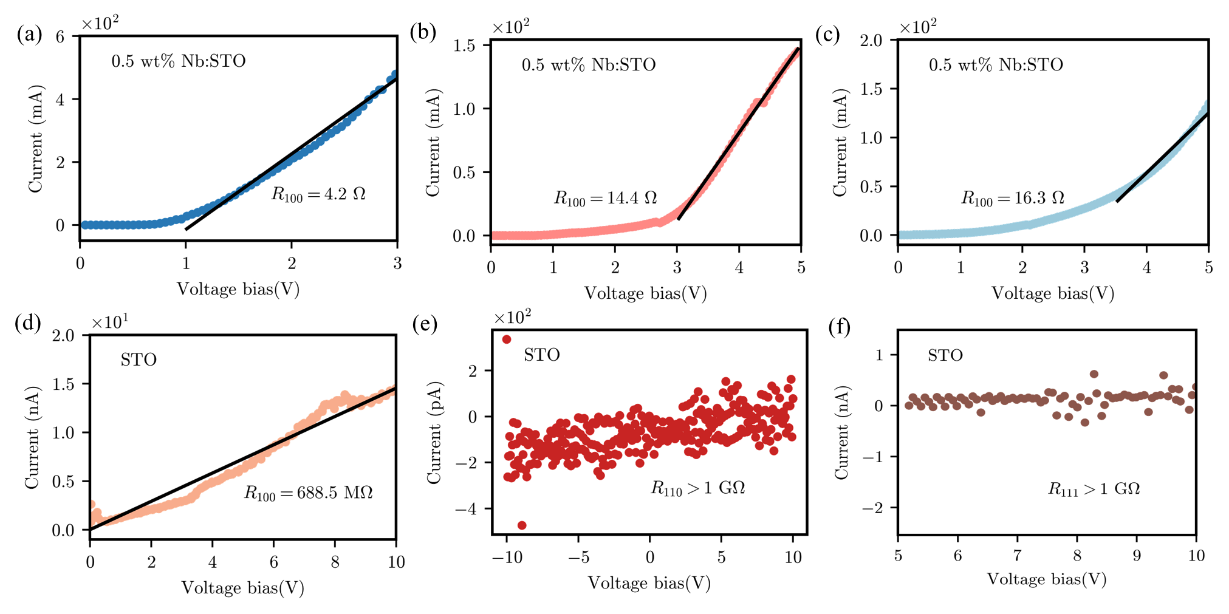


**FIG. S7**. I-V characteristics of Nb-doped SrTiO3 (NbSTO) and undoped SrTiO3 (STO) single crystals. **a–c** NbSTO with(100), (110) and (111) facets respectively. **d–f** STO with(100), (110) and (111) facets respectively.

**8 Electron-hole migration asymmetry governs photocatalytic and flexoelectricity for Rutile TiO2**

We also investigate the intrinsic link of Rutile TiO2 between the facet-dependent photocatalytic activity and flexoelectricity in the framework of semiconductor facet engineering, aiming to further support the hypothesis that anisotropic carrier migration dominates the anisotropic flexoelectric behavior across different crystal facets. Rutile TiO2 exhibits distinct photocatalytic performance on different crystal facets, for instance, the (100) and (110) facets exhibit a reduction rate approximately an order of magnitude lower than the (101), (111), and (001) facets, suggesting lower photocatalytic reduction activity. Notably, the (110) and (100) crystal facets emerge as unique in both photocatalysis and flexoelectricity, hinting at the same underlying mechanism. Our DFT calculations reveal that the effective masses of electrons and holes exhibit opposite anisotropic behaviors across different crystal facets, which provides insight into the observed variations in photocatalytic performance. Photocatalytic reactions inherently involve redox cycles, requiring both electron and hole participation, and the rate of these reactions depends on the mobility and concentration of the involved charge carriers. When either the migration rate or the carrier concentration is deficient, the overall reaction rate becomes limited by the slowest process. The (110) and (100) crystal facets exhibit the significant disparity in effective mass between electron and hole ( and ). Thus, the slower migration of holes makes the oxidation reaction the limiting factor, thereby reducing the total reaction rate. Conversely, the (101), (111), and (001) crystal facets exhibit a smaller disparity in effective mass between electrons and holes (, and), resulting in more efficient electron-hole cooperation and faster overall reduction reaction rates. These insights not only account for the crystal facet engineering in photocatalysis but also further support the hypothesis that anisotropic carrier migration is a key factor in determining flexoelectricity.

**References**

1. Narvaez, J. *et al.* Enhanced flexoelectric-like response in oxide semiconductors. *Nature* 538, 219–221 (2016).

2. Shu, L. *et al.* Photoflexoelectric effect in halide perovskites. *Nat. Mater.* **19**, 605–609 (2020).

3. Bardeen, J. *et al.* Deformation Potentials and Mobilities in Non-Polar Crystals. *Phys. Rev.* **80**, 72–80 (1950).

4. Wang, V. *et al*. VASPKIT: A user-friendly interface facilitating high-throughput computing and analysis using VASP code. *Computer Physics Communications* **267**, 108033 (2021).

1. *These authors contributed equally

   Contact author: [xliang226@xjtu.edu.cn](mailto:xliang226@xjtu.edu.cn)

   ‡Contact author: [sshen@xjtu.edu.cn](mailto:sshen@xjtu.edu.cn) [↑](#footnote-ref-1)
